# Supplementary material for: Isolation of Three Metallothionein Genes and Their Roles in Mediating Cadmium Resistance
Source: MDPI journal article supplement (doi:10.3390/agronomy12122971), 2022-11-26
Supplement: s1 [file s1]

**Table S1** Primer sequences used in this study

| Primer name   | Primer Sequences (5'–3')                                |
|---------------|---------------------------------------------------------|
| MT 2-22a-L    | <u>gaagcttgagctc</u> ATGTCTTGCTGCGGAGGAA                |
| MT 2-22a-R1   | <u>gtctaga</u> TCATTTGCAGGTGCAAGGG                      |
| MT 2-22a-R2   | <u>gggatcctcctcctcctcctcctcc</u> TTTGCAGGTGCAAGGGTTG    |
| MT 2-22b-L    | <u>gaagcttgagctc</u> ATGTCTTGCTGTGGAGGAAA               |
| MT 2-22b-R1   | <u>gtctaga</u> TCATTTACAAGTGCAAGGGTT                    |
| MT 2-22b-R2   | <u>gggatcctcctcctcctcctcctcc</u> TTTACAAGTGCAAGGGTTGTC  |
| MT 3b-L       | <u>ggatccgagctc</u> ATGTCTTCGTGCGGAAACTGC               |
| MT 3b-R1      | <u>gtctaga</u> TTAATTGGGGCAGCAAGTGCA                    |
| MT 3b-R2      | <u>gggatcctcctcctcctcctcctcc</u> ATTAATTGGGGCAGCAAGTGCA |
| mRFP -L       | <u>gggatcc</u> ATGGCCTCCTCCGAGGACG                      |
| mRFP-R        | <u>ggaattc</u> TTAGGCGCCGGTGGAGTGG                      |
| MT2-22a-qRT-F | ACCACCGAGACTCTTGTCCT                                    |
| MT2-22a-qRT-R | ACAACCGGAGAAATCAGCCA                                    |
| MT2-22b-qRT-F | CAGACTTGGGCTTCTCAGGG                                    |
| MT2-22b-qRT-R | ACAGGACTCACATAGCCAGC                                    |
| MT3-qRT-F     | CACCATAATTGGCAGAGATGCTCA                                |
| MT3-qRT-R     | GGTTCCCTTCTTCACGCAC                                     |
| Actin-qRT-F   | ACAGTGTCTGGATCGGTGGTTC                                  |
| Actin-qRT-R   | TGCCTCATCATACTCAGCCTTG                                  |

Restriction endonucleases sites were underlined
